# Supplementary material
Source: PubMed Central journal article supplement (PMC2711181)
Supplement: emboj2009144s1.pdf [file emboj2009144s1.pdf]

**Figure S1 (Wu *et al.*)**

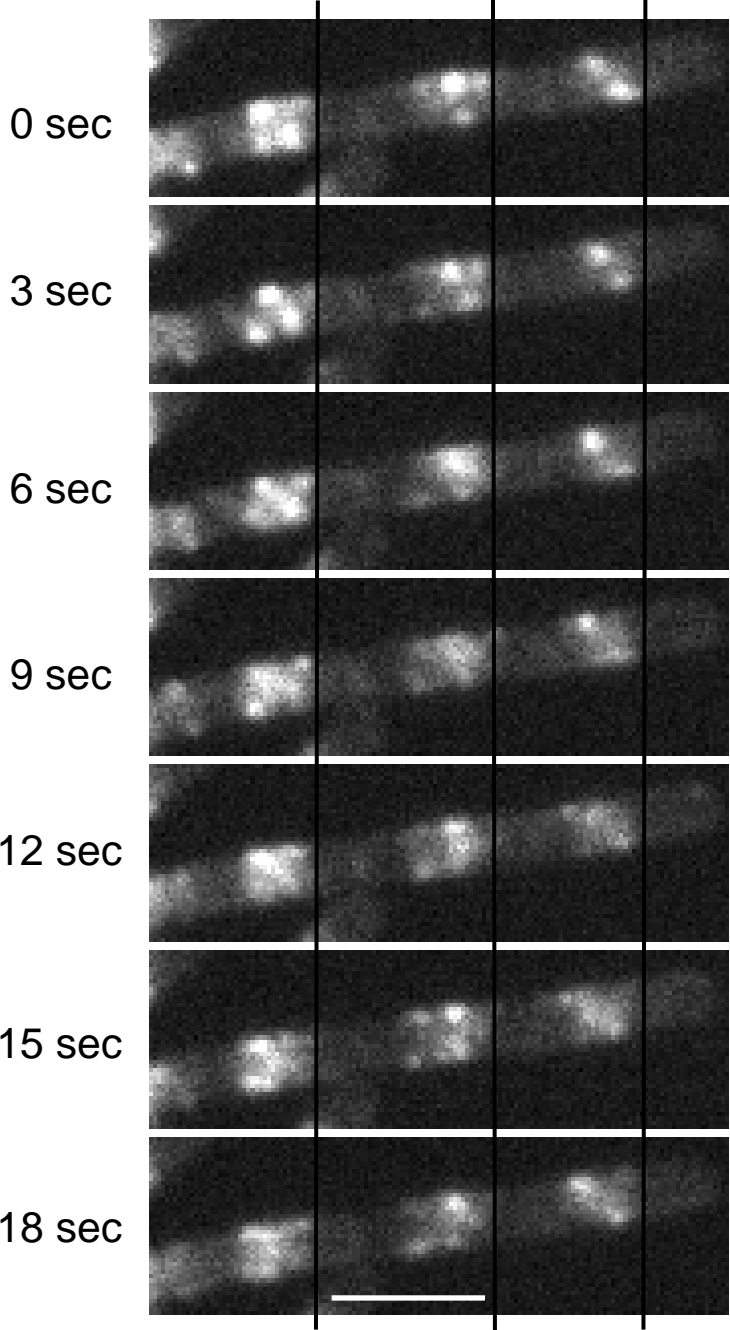

Fig S2 (Wu *et al.*)

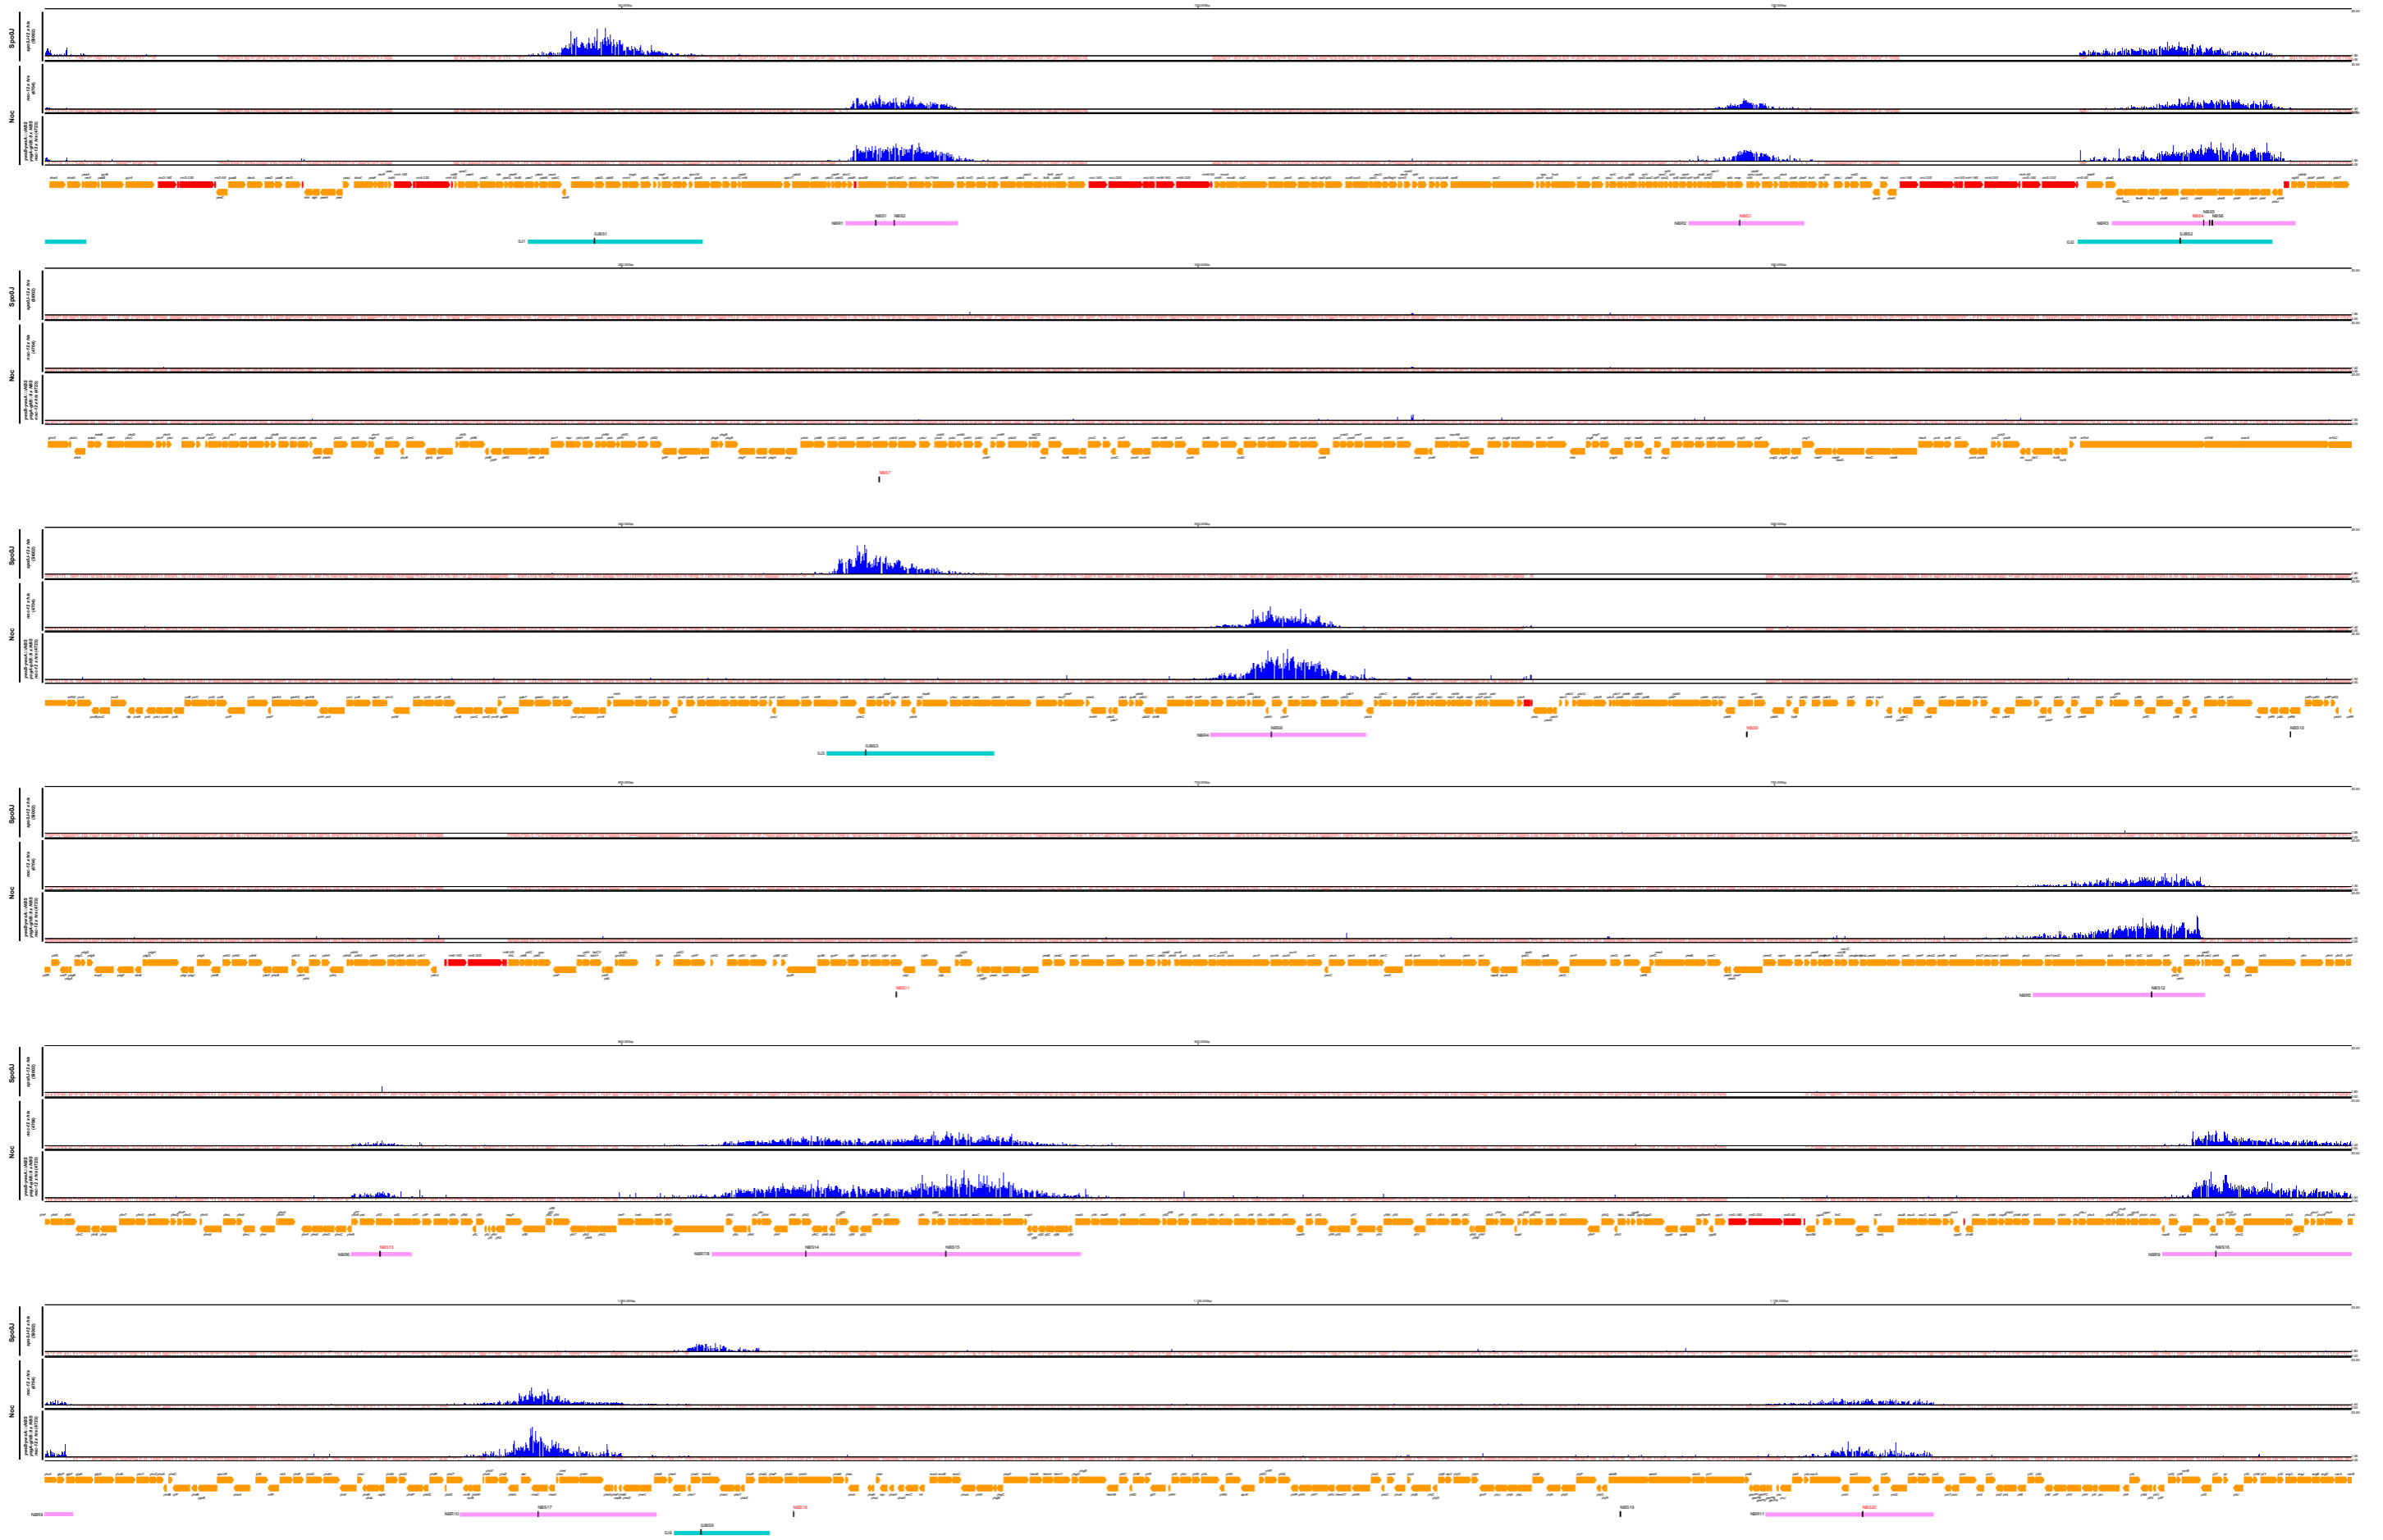

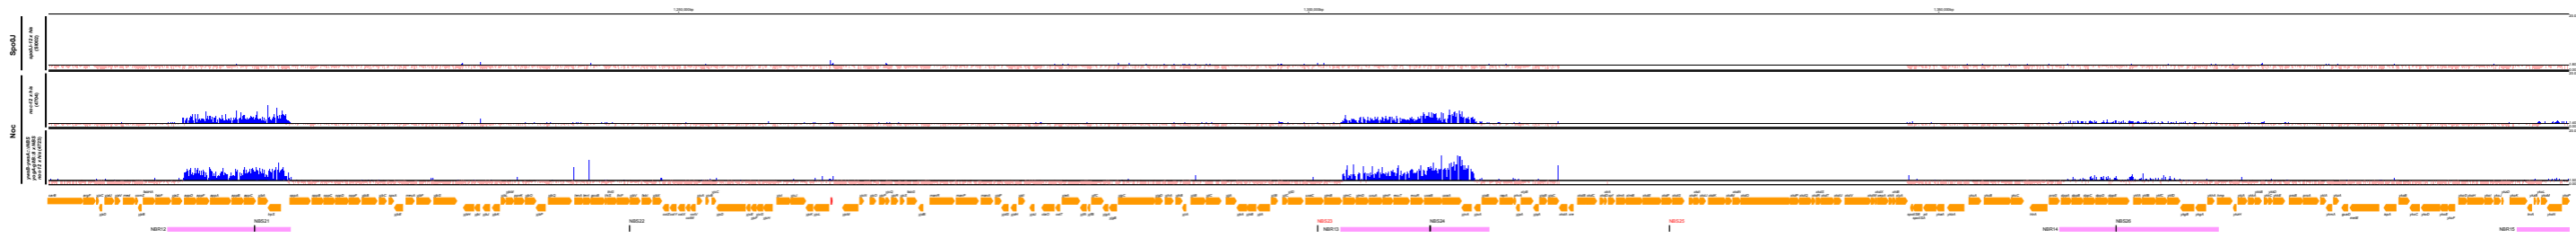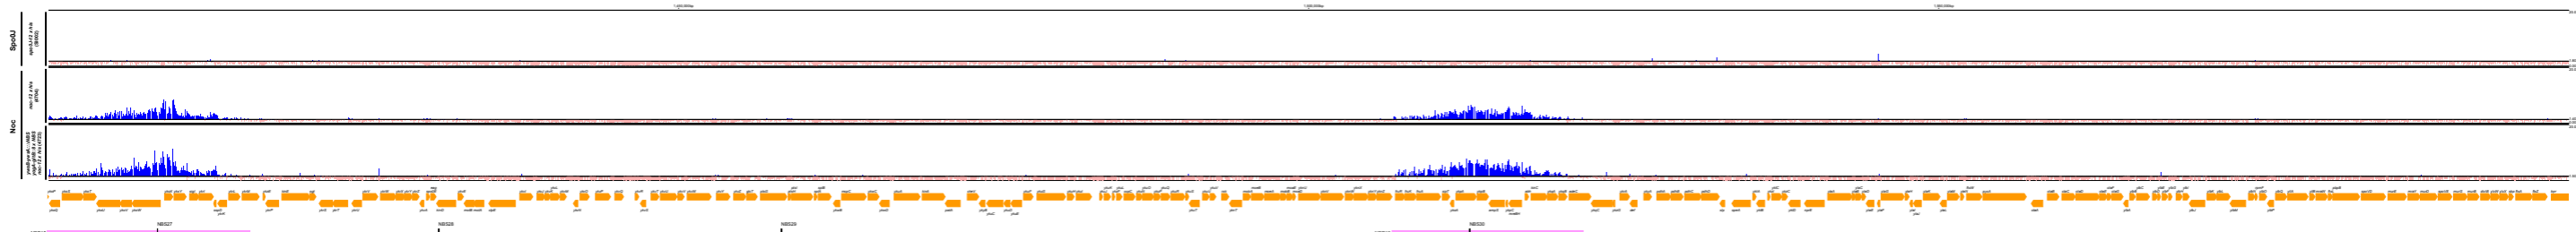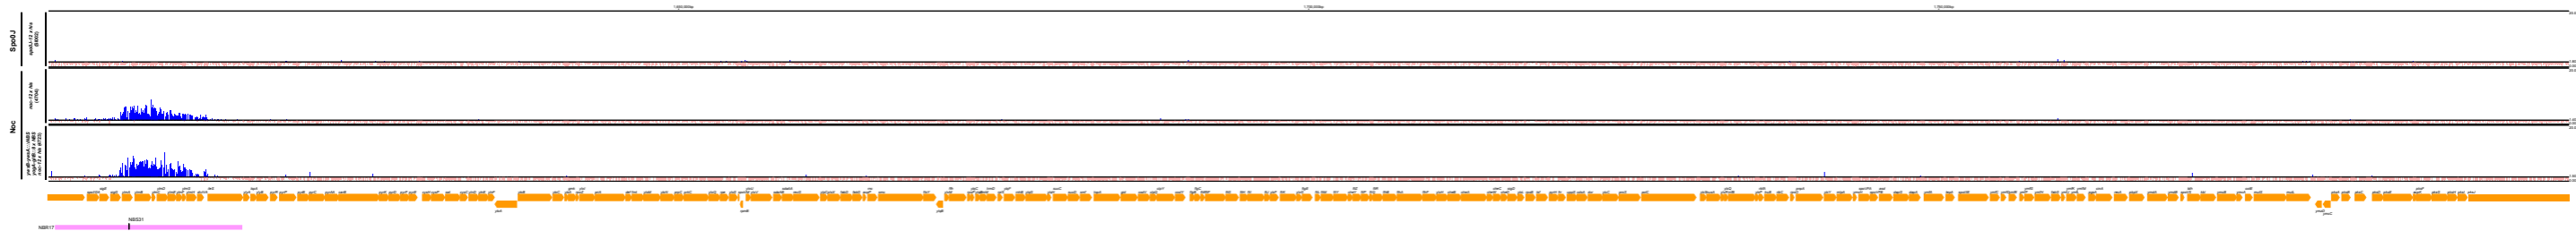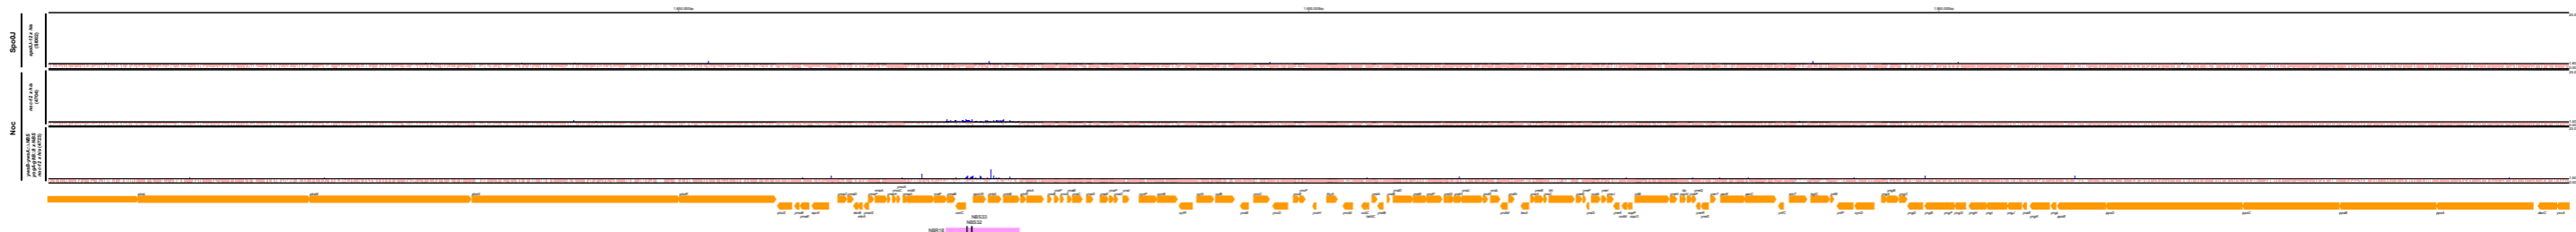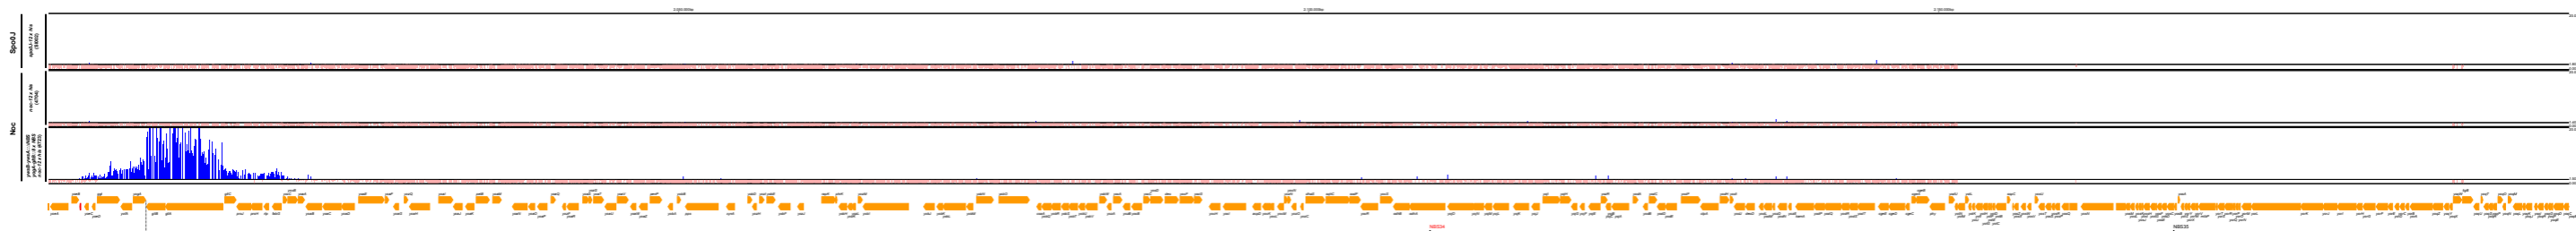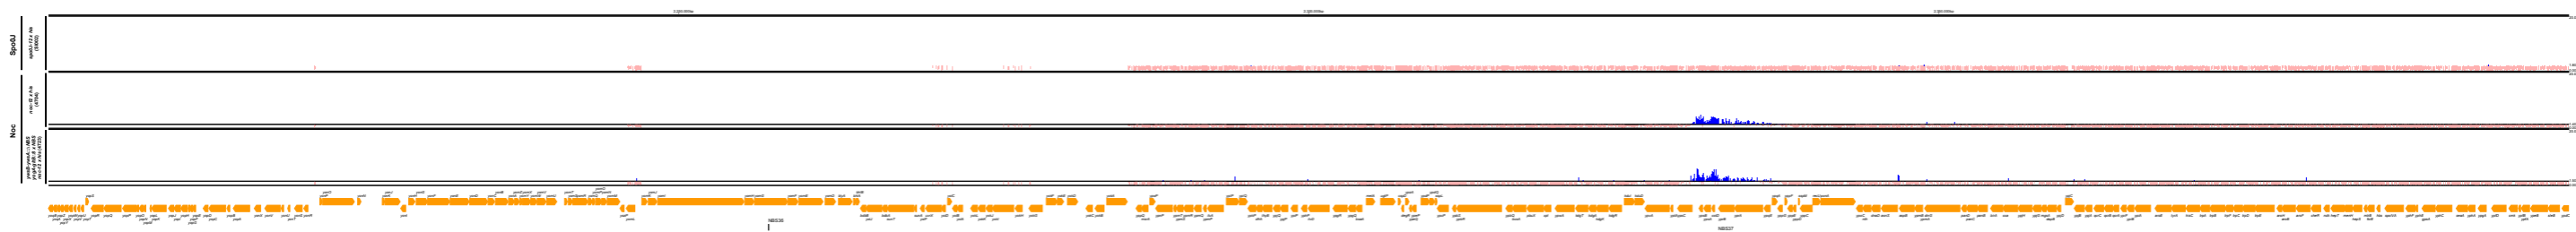

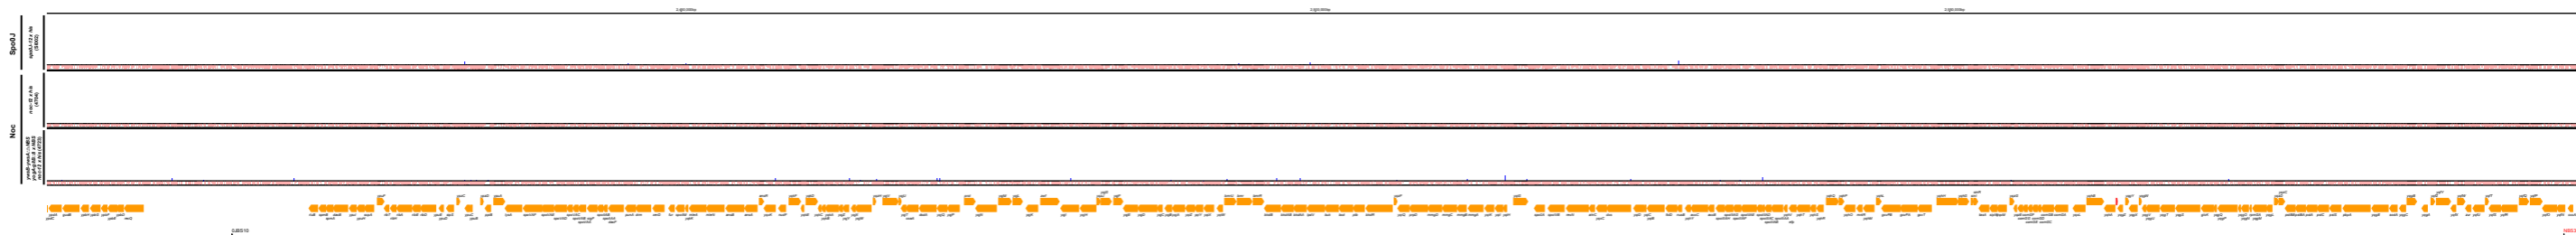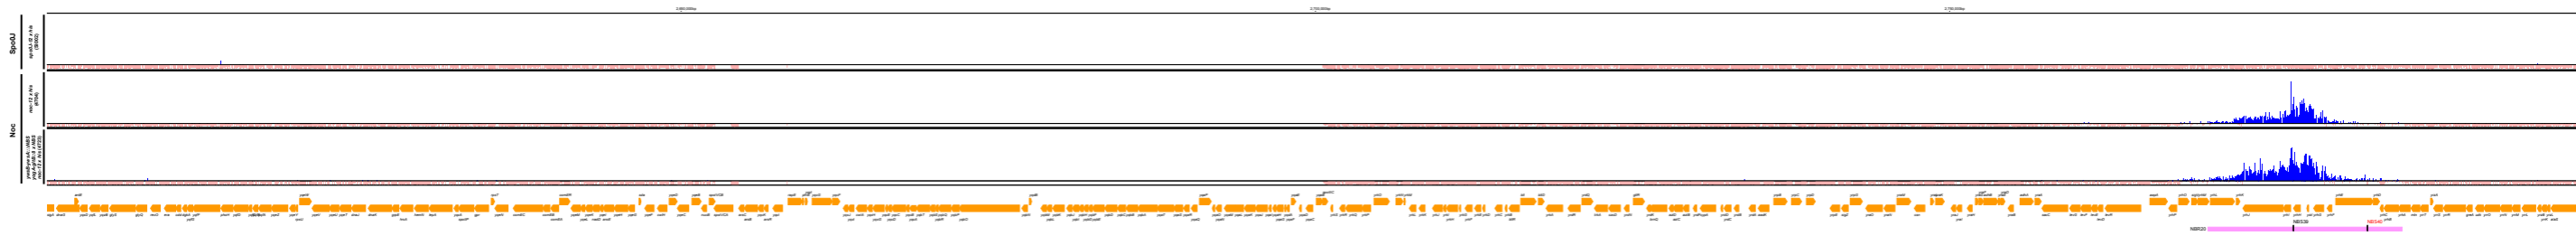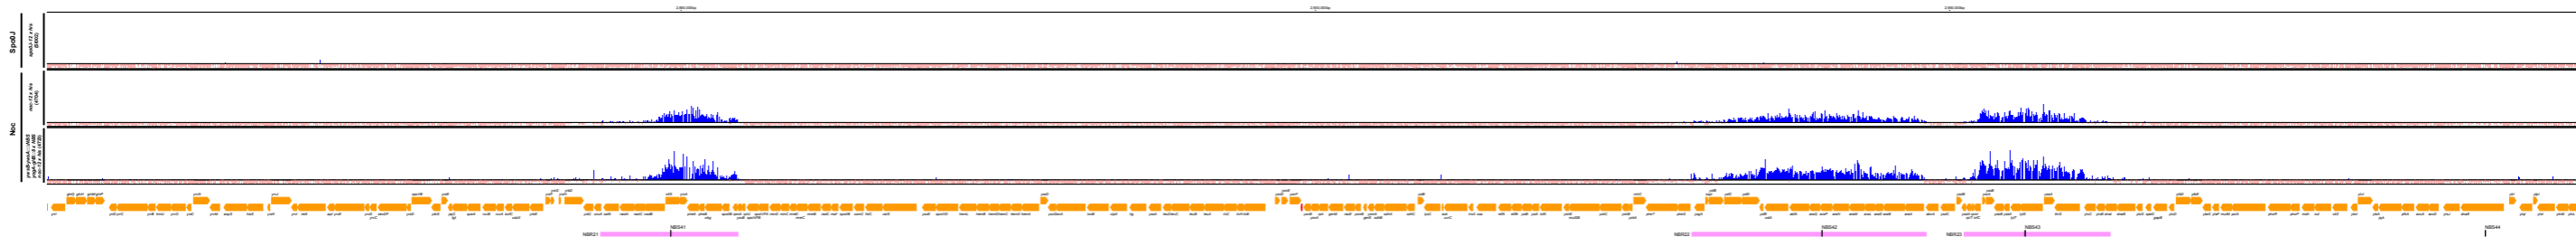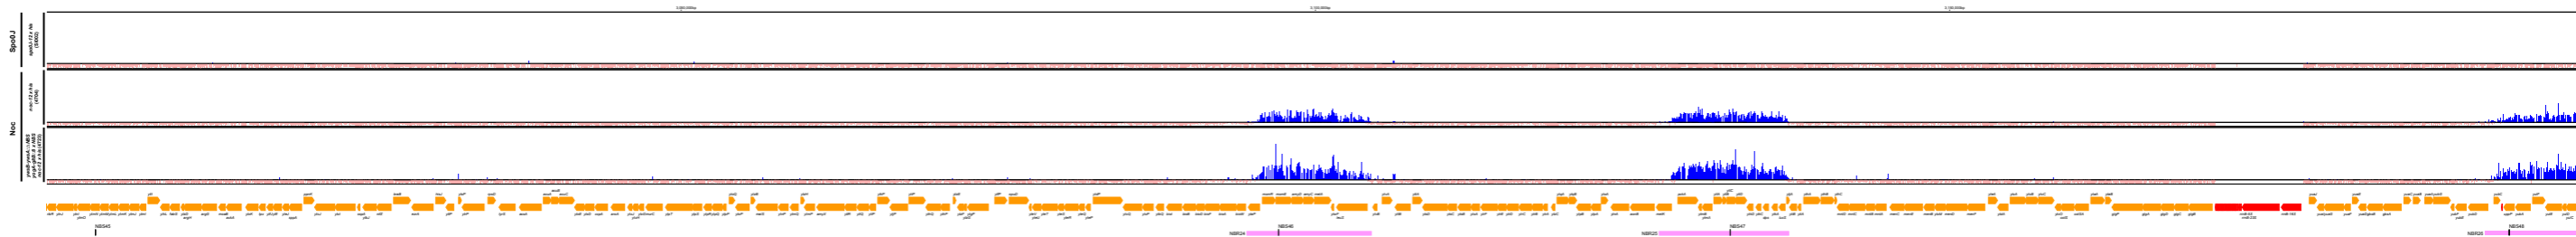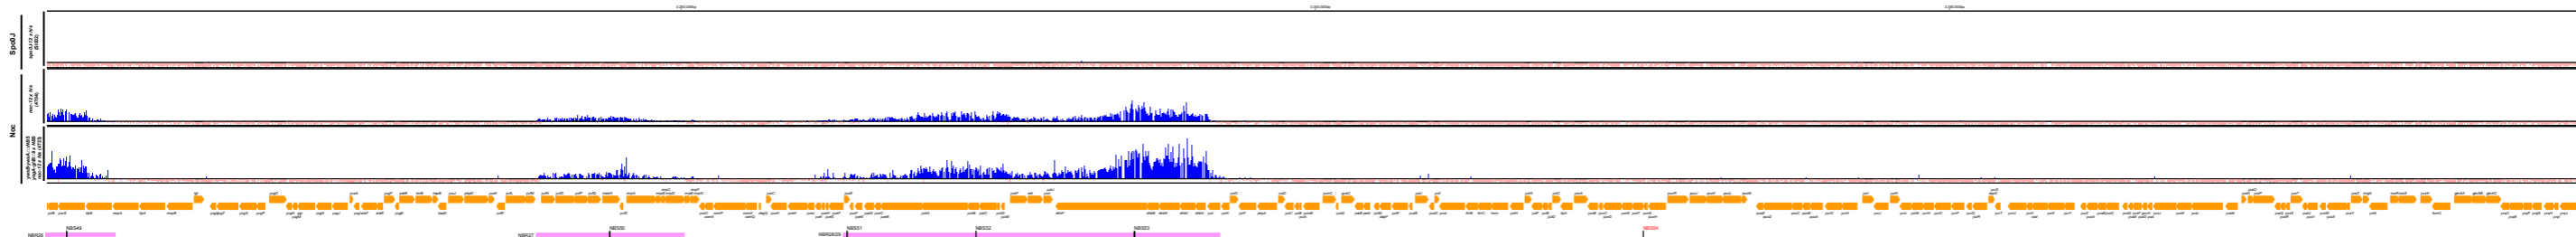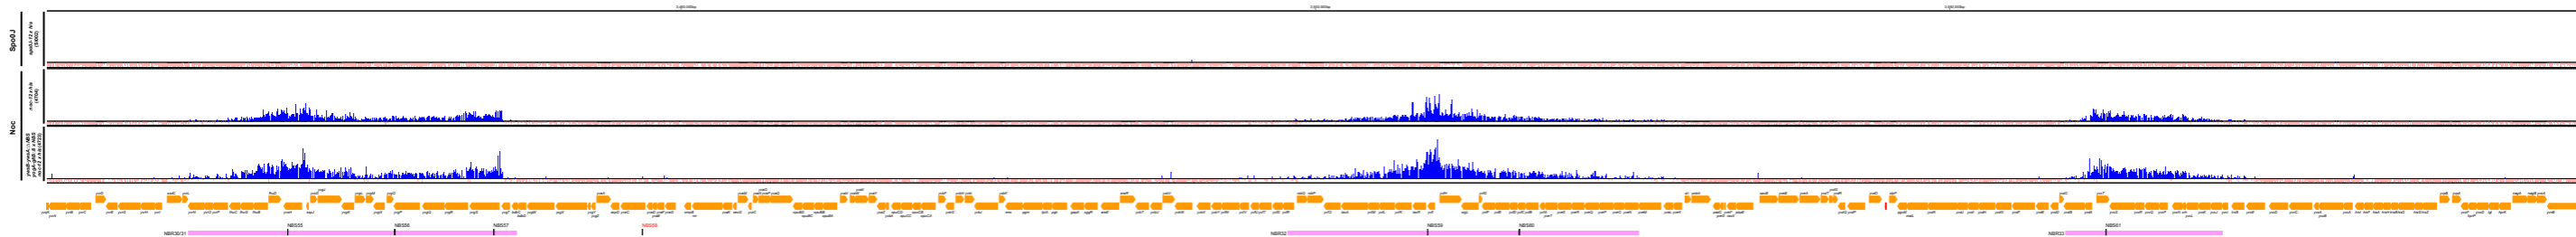

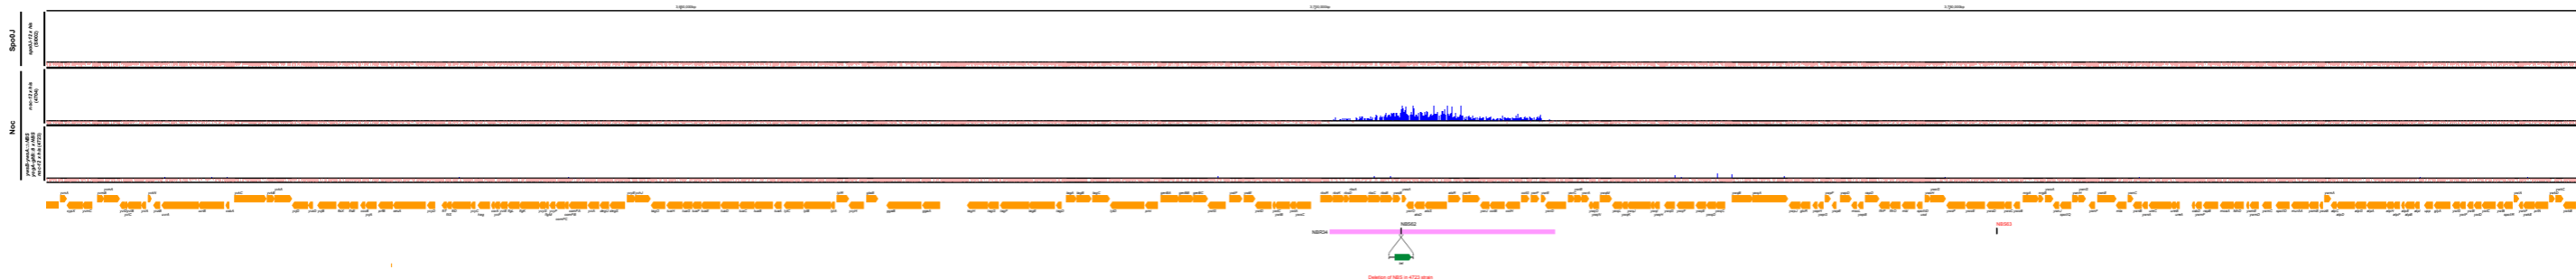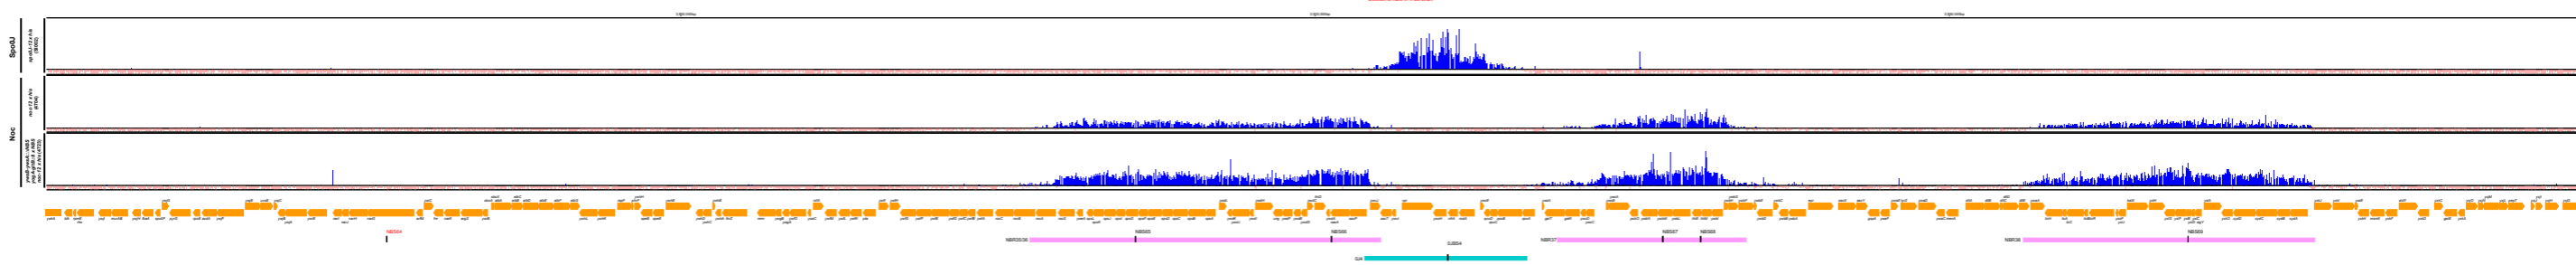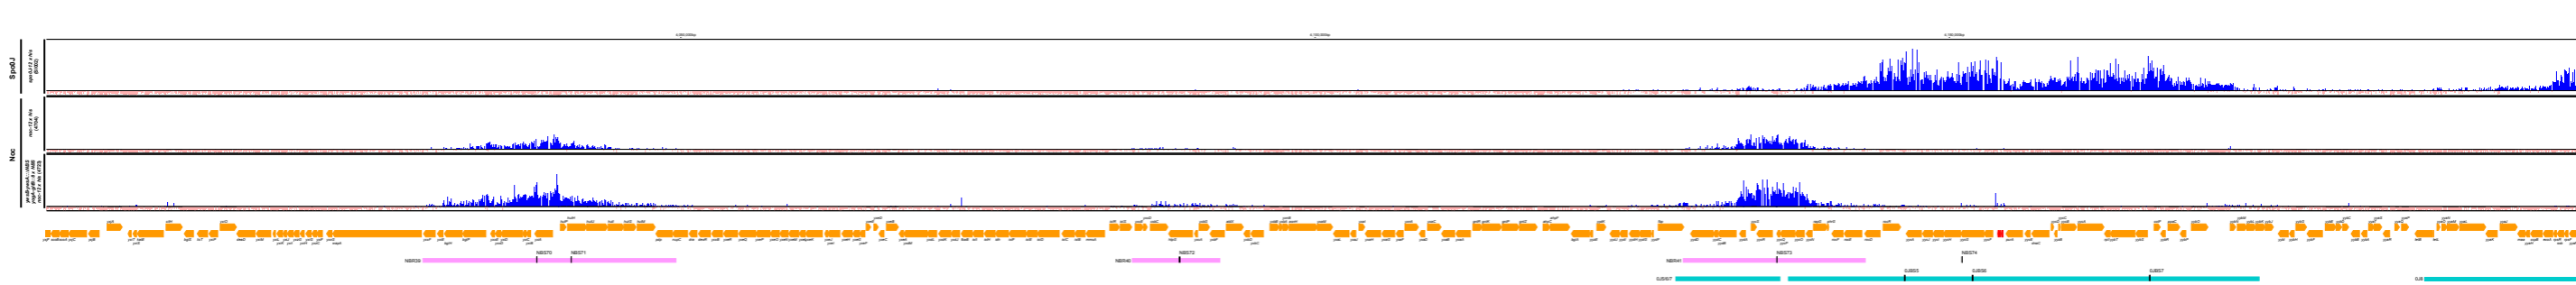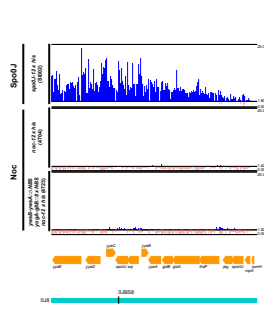

(A)

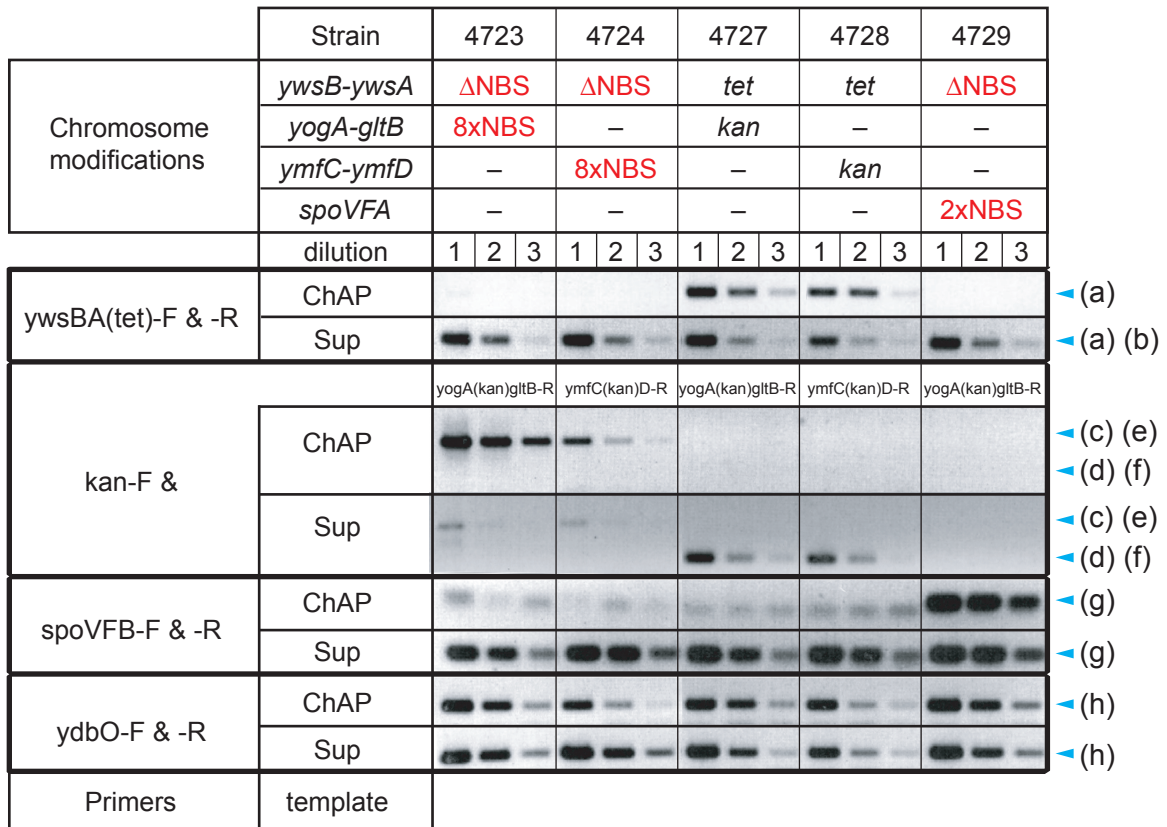

(B)

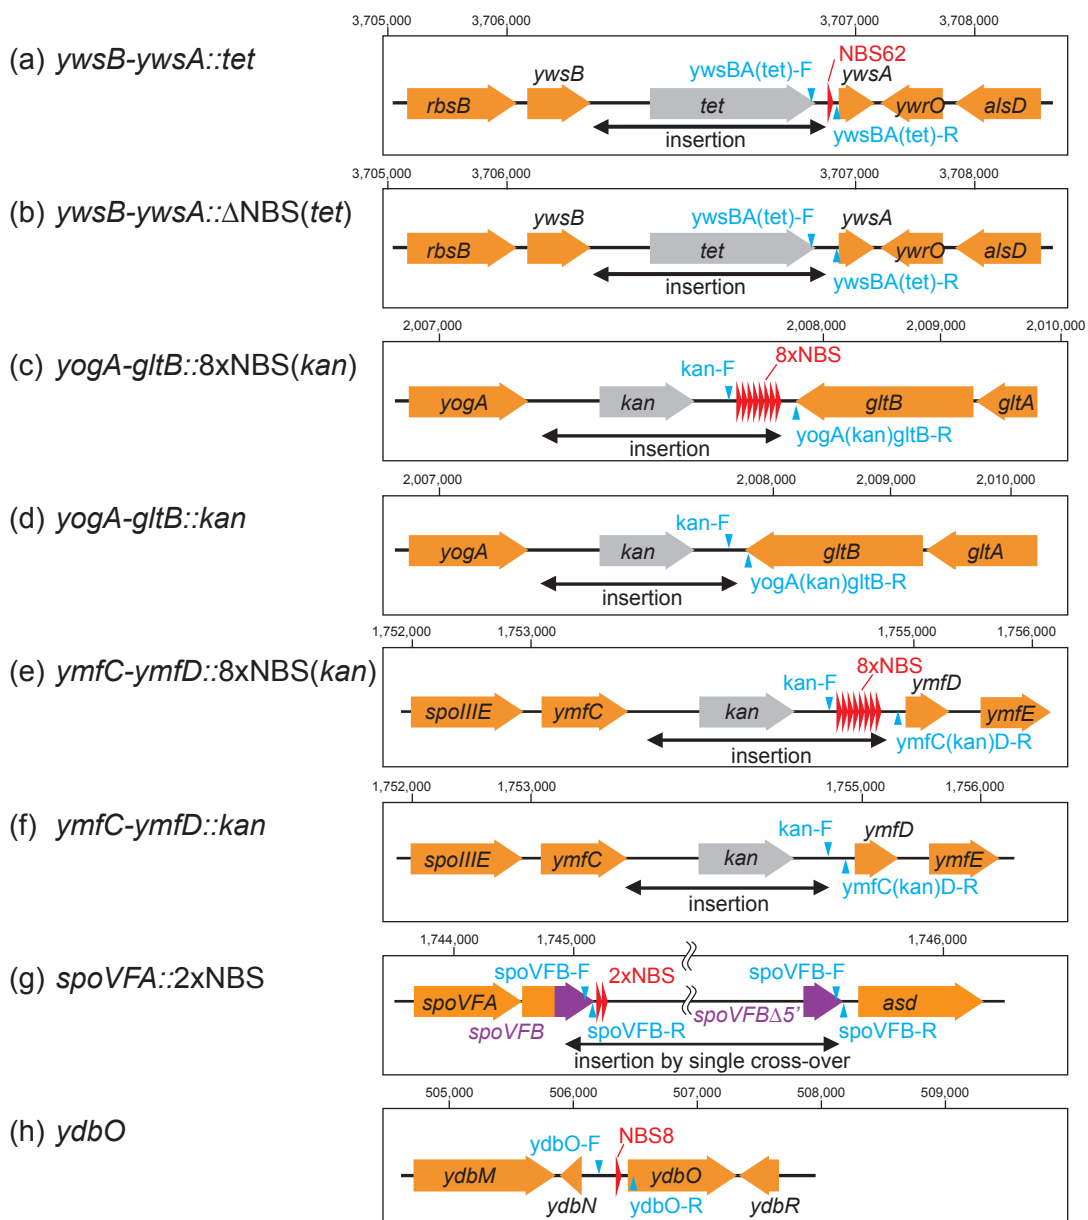

Fig S4 (Wu *et al.*)

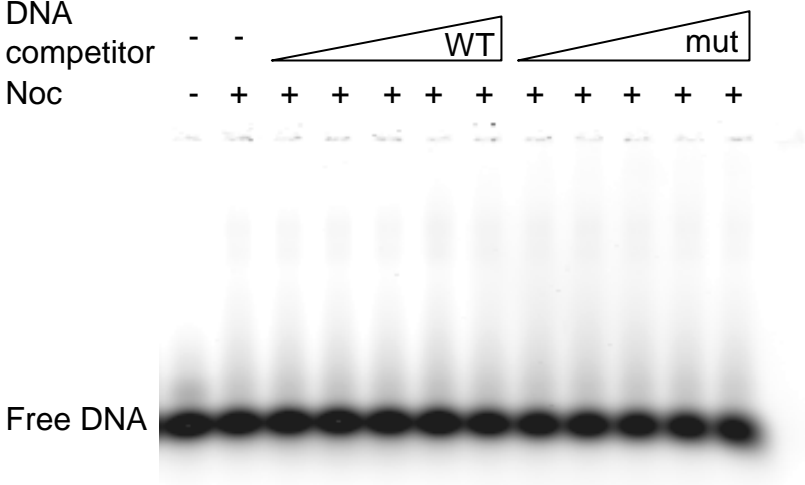

Figure S5 (Wu et al)

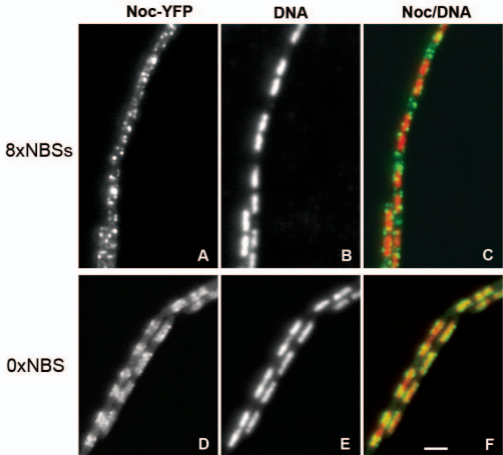



Table S1

|     | binding region <sup>a</sup> |           |           | binding sequence <sup>b</sup> |              |              |                                          |                        |           |           |
|-----|-----------------------------|-----------|-----------|-------------------------------|--------------|--------------|------------------------------------------|------------------------|-----------|-----------|
|     | ID                          | start     | end       | length (kbp)                  | ID           | PWM Score    | sequence                                 | other NBS <sup>c</sup> | start     | end       |
| Noc |                             |           |           |                               |              |              | ATTTC <sup>c</sup> CCCGGAAAT (consensus) |                        |           |           |
|     | NBR1                        | 69,424    | 79,118    | 9.7                           | NBS1         | 15.20        | ATTTC <sup>c</sup> CCCGaGAAAa            |                        | 72,015    | 72,028    |
|     |                             |           |           |                               | NBS2         | 16.44        | ATTTC <sup>c</sup> CCCGGGAAAa            | NBS43                  | 73,631    | 73,644    |
|     | NBR2                        | 142,528   | 152,527   | 10.0                          | <i>NBS3</i>  | <i>14.87</i> | ATTgCgtGGGAAAT                           |                        | 146,960   | 146,973   |
|     |                             |           |           |                               | <i>NBS4</i>  | <i>15.01</i> | ATTTtCaGGGAAAT                           |                        | 187,198   | 187,211   |
|     | NBR3                        | 179,286   | 195,163   | 15.9                          | NBS5         | 15.56        | ATgTCCCGGAAAT                            |                        | 187,701   | 187,714   |
|     |                             |           |           |                               | NBS6         | 16.18        | ATTcCCtGGGAAAT                           | NBS24                  | 187,956   | 187,969   |
|     | ND <sup>d</sup>             |           |           |                               | <i>NBS7</i>  | <i>15.10</i> | ATTTCCttGGAAAg                           |                        | 272,185   | 272,198   |
|     | NBR4                        | 501,045   | 514,543   | 13.5                          | NBS8         | 15.99        | ATTgCCC <sup>c</sup> GGGAAAa             |                        | 506,319   | 506,332   |
|     | (phage) <sup>e</sup>        |           |           |                               | <i>NBS9</i>  | <i>15.10</i> | ATTTCCaaGGAAAa                           |                        | 547,503   | 547,516   |
|     | ND                          |           |           |                               | NBS10        | 15.49        | ATTgCCC <sup>c</sup> GAAAT               |                        | 594,729   | 594,742   |
|     | ND                          |           |           |                               | <i>NBS11</i> | <i>15.13</i> | ATTgCCaaGGgAAT                           |                        | 673,920   | 673,933   |
|     | NBR5                        | 772,414   | 787,284   | 14.9                          | NBS12        | 16.47        | ATTgCCC <sup>c</sup> GGGcAAT             |                        | 782,691   | 782,704   |
|     | NBR6                        | 826,549   | 831,774   | 5.2                           | <i>NBS13</i> | <i>14.92</i> | AaTcCCC <sup>c</sup> GGGAAAT             |                        | 829,022   | 829,035   |
|     | NBR7                        | 857,841   | 889,812   | 32.0                          | NBS14        | 15.97        | ATTTc <sup>c</sup> CGGGAAAT              | NBS 39, 68             | 865,963   | 865,976   |
|     | NBR8                        |           |           |                               | NBS15        | 15.91        | ATTTCCaaGGAAAT                           |                        | 878,110   | 878,123   |
|     | NBR9                        | 983,632   | 1,002,353 | 18.7                          | NBS16        | 16.40        | ATTTCCCGGGAAAa                           | NBS66                  | 988,267   | 988,280   |
|     | NBR10                       | 1,035,971 | 1,052,980 | 17.0                          | NBS17        | 15.54        | ATTcCCgaGGAAAT                           |                        | 1,042,746 | 1,042,759 |
|     | ND                          |           |           |                               | <i>NBS18</i> | <i>15.12</i> | tTTaCCC <sup>c</sup> GGGAAAa             |                        | 1,064,797 | 1,064,810 |
|     | ND                          |           |           |                               | NBS19        | 15.60        | ATTgCt <sup>c</sup> CGGGAAAT             |                        | 1,136,603 | 1,136,616 |
|     | NBR11                       | 1,149,211 | 1,163,760 | 14.6                          | <i>NBS20</i> | <i>14.91</i> | ATTTCCCGGcAAAa                           |                        | 1,157,631 | 1,157,644 |
|     | NBR12                       | 1,209,448 | 1,219,187 | 9.7                           | NBS21        | 15.16        | ATagCCC <sup>c</sup> GGGAAAT             |                        | 1,216,340 | 1,216,353 |
|     | ND                          |           |           |                               | NBS22        | 15.69        | ATTgCCC <sup>c</sup> GGGcAAAa            |                        | 1,246,089 | 1,246,102 |
|     | ND                          |           |           |                               | <i>NBS23</i> | <i>14.92</i> | ATTaCCC <sup>c</sup> GGgAAAa             |                        | 1,300,864 | 1,300,877 |
|     | NBR13                       | 1,302,538 | 1,314,295 | 11.8                          | NBS24        | 16.18        | ATTcCCtGGGAAAT                           | NBS6                   | 1,309,612 | 1,309,625 |
|     | (phage)                     |           |           |                               | <i>NBS25</i> | <i>15.04</i> | ATTTCCacGGAAAa                           |                        | 1,327,478 | 1,327,491 |
|     | NBR14                       | 1,359,589 | 1,372,178 | 12.6                          | NBS26        | 15.66        | ATTTaCCGGGAAAT                           |                        | 1,364,056 | 1,364,069 |
|     | NBR15                       | 1,395,873 | 1,416,015 | 20.1                          | NBS27        | 16.74        | ATTaCCC <sup>c</sup> GGGAAAT             |                        | 1,408,639 | 1,408,652 |
|     | ND                          |           |           |                               | NBS28        | 15.35        | ATTTCCtGaGAAAT                           | NBS36,62,73            | 1,430,963 | 1,430,976 |
|     | ND                          |           |           |                               | NBS29        | 16.10        | ATTaCCgGGGAAAT                           |                        | 1,458,161 | 1,458,174 |
|     | NBR16                       | 1,506,620 | 1,521,783 | 15.2                          | NBS30        | 16.57        | ATTTCCgGGGAAAT                           | NBS70                  | 1,512,772 | 1,512,785 |
|     | NBR17                       | 1,600,540 | 1,615,333 | 14.8                          | NBS31        | 16.07        | ATTgCCC <sup>c</sup> GGGAAAa             |                        | 1,606,379 | 1,606,392 |
|     | NBR18                       | 1,871,232 | 1,877,034 | 5.8                           | NBS32        | 15.16        | ATTTc <sup>c</sup> CGGGAAAa              | NBS33                  | 1,872,877 | 1,872,890 |
|     |                             |           |           |                               | NBS33        | 15.16        | ATTTc <sup>c</sup> CGGGAAAa              | NBS32                  | 1,873,274 | 1,873,287 |
|     | ND                          |           |           |                               | <i>NBS34</i> | <i>14.97</i> | ATTcCCtGGGgAAG                           |                        | 2,109,707 | 2,109,720 |
|     | (phage)                     |           |           |                               | NBS35        | 16.03        | ATTTCCCGGGcAAG                           |                        | 2,168,634 | 2,168,647 |
|     | (phage)                     |           |           |                               | NBS36        | 15.35        | ATTTCCtGaGAAAT                           | NBS28,62,73            | 2,257,123 | 2,257,136 |
|     | NBR19                       | 2,330,277 | 2,337,738 | 7.5                           | NBS37        | 16.00        | ATTcCCC <sup>c</sup> GGGAAAa             |                        | 2,332,505 | 2,332,518 |
|     | ND                          |           |           |                               | <i>NBS38</i> | <i>14.96</i> | ATTgCCGgAaGAAAT                          |                        | 2,598,414 | 2,598,427 |
|     | NBR20                       | 2,770,362 | 2,785,662 | 15.3                          | NBS39        | 15.97        | ATTTc <sup>c</sup> CGGGAAAT              | NBS14, 68              | 2,777,087 | 2,777,100 |
|     | ND                          |           |           |                               | <i>NBS40</i> | <i>14.92</i> | ATTTCCgGaGgAAT                           |                        | 2,782,892 | 2,782,905 |
|     | NBR21                       | 2,843,648 | 2,854,479 | 10.8                          | NBS41        | 15.48        | ATTaCCgaGGAAAT                           |                        | 2,849,169 | 2,849,182 |
|     | NBR22                       | 2,929,677 | 2,948,154 | 18.5                          | NBS42        | 16.34        | ATTaCCC <sup>c</sup> GGGgAAT             |                        | 2,939,921 | 2,939,934 |
|     | NBR23                       | 2,951,132 | 2,962,647 | 11.5                          | NBS43        | 16.44        | ATTTCCCGGGAAAa                           | NBS2                   | 2,955,940 | 2,955,953 |
|     | ND                          |           |           |                               | NBS44        | 15.31        | ATTgCCC <sup>c</sup> GaAAAT              | NBS45                  | 2,992,211 | 2,992,224 |
|     | ND                          |           |           |                               | NBS45        | 15.31        | ATTgCCC <sup>c</sup> GaAAAT              | NBS44                  | 3,003,833 | 3,003,846 |
|     | NBR24                       | 3,094,616 | 3,104,422 | 9.8                           | NBS46        | 16.22        | ATTgCctGGGAAAT                           |                        | 3,097,098 | 3,097,111 |
|     | NBR25                       | 3,127,110 | 3,137,321 | 10.2                          | NBS47        | 16.53        | ATTTCCaGGGAAAT                           |                        | 3,132,695 | 3,132,708 |
|     | NBR26                       | 3,192,210 | 3,205,375 | 13.2                          | NBS48        | 15.83        | ATTgCCgGGGcAAT                           |                        | 3,194,104 | 3,194,117 |
|     |                             |           |           |                               | NBS49        | 16.20        | ATTgCCgGGGAAAT                           |                        | 3,201,557 | 3,201,570 |
|     | NBR27                       | 3,238,587 | 3,250,257 | 11.7                          | NBS50        | 15.79        | ATTgCCgGGGgAAT                           |                        | 3,244,378 | 3,244,391 |

|                    |           |           |      |              |              |                                                      |           |           |           |
|--------------------|-----------|-----------|------|--------------|--------------|------------------------------------------------------|-----------|-----------|-----------|
| NBR28              | 3,262,776 | 3,292,455 | 29.7 | NBS51        | 15.68        | ATTT <b>g</b> CCGGGAAAT                              | 3,263,064 | 3,263,077 |           |
|                    |           |           |      | NBS52        | 15.81        | ATTTCC <b>CCa</b> GGAAA <b>a</b>                     | 3,273,229 | 3,273,242 |           |
| NBR29              |           |           |      | NBS53        | 17.21        | ATTTCCCGGGAAAT                                       | 3,285,728 | 3,285,741 |           |
| ND                 |           |           |      | <i>NBS54</i> | <i>15.10</i> | ATTTCC <b>ga</b> GGAAA <b>c</b>                      | 3,325,833 | 3,325,846 |           |
| NBR30              |           |           |      | NBS55        | 15.31        | ATT <b>gt</b> CCGGGAAAT                              | 3,418,984 | 3,418,997 |           |
| NBR31              | 3,411,168 | 3,437,030 | 25.9 | NBS56        | 15.56        | AT <b>g</b> TCCCGGGAAAT                              | 3,427,425 | 3,427,438 |           |
|                    |           |           |      | NBS57        | 15.41        | ATT <b>c</b> CC <b>CCa</b> GGAAA <b>a</b>            | 3,435,226 | 3,435,239 |           |
| ND                 |           |           |      | <i>NBS58</i> | <i>15.13</i> | ATTTCC <b>tt</b> GGAAA <b>a</b>                      | 3,447,075 | 3,447,088 |           |
| NBR32              | 3,497,825 | 3,525,469 | 27.6 | NBS59        | 16.84        | ATT <b>g</b> CCCGGGAAAT                              | 3,508,841 | 3,508,854 |           |
|                    |           |           |      | NBS60        | 15.82        | ATTTCC <b>t</b> GGGAAA <b>a</b>                      | 3,516,074 | 3,516,087 |           |
| NBR33              | 3,559,126 | 3,571,479 | 12.4 | NBS61        | 16.03        | ATTTCCCGGGGAA <b>a</b>                               | 3,562,307 | 3,562,320 |           |
| NBR34              | 3,701,174 | 3,718,878 | 17.7 | NBS62        | 15.35        | ATTTCC <b>tGa</b> GAAATNBS28,36, 7:                  | 3,706,775 | 3,706,788 |           |
| ND                 |           |           |      | <i>NBS63</i> | <i>15.02</i> | ATT <b>c</b> CC <b>CCg</b> CCAA <b>a</b>             | 3,753,679 | 3,753,692 |           |
| ND                 |           |           |      | <i>NBS64</i> | <i>14.94</i> | ATT <b>c</b> cttGGGAAAT                              | 3,826,860 | 3,826,873 |           |
| NBR35              |           |           |      | NBS65        | 15.28        | ATT <b>ct</b> CCCGGGAAAT                             | 3,885,840 | 3,885,853 |           |
| NBR36              | 3,877,522 | 3,905,167 | 27.6 | NBS66        | 16.40        | ATTTCCCGGGAAA <b>g</b> NBS16                         | 3,901,296 | 3,901,309 |           |
| NBR37              | 3,919,086 | 3,933,964 | 14.9 | NBS67        | 15.80        | ATTTCC <b>g</b> GGGAAA <b>a</b>                      | 3,927,398 | 3,927,411 |           |
|                    |           |           |      | NBS68        | 15.97        | ATTT <b>ct</b> CGGGAAAT NBS14, 39                    | 3,930,376 | 3,930,389 |           |
| NBR38              | 3,955,818 | 3,978,799 | 23.0 | NBS69        | 15.35        | ATTT <b>ctt</b> GGGAAAT                              | 3,968,799 | 3,968,812 |           |
| NBR39              | 4,029,664 | 4,049,613 | 20.0 | NBS70        | 16.57        | ATTTCC <b>g</b> GGGAAAT NBS30                        | 4,038,650 | 4,038,663 |           |
|                    |           |           |      | NBS71        | 15.31        | ATT <b>g</b> CC <b>ct</b> GGAAA <b>c</b>             | 4,041,348 | 4,041,361 |           |
| NBR40              | 4,085,587 | 4,092,485 | 6.9  | NBS72        | 15.29        | ATTTCC <b>aGa</b> GAAAT                              | 4,089,302 | 4,089,315 |           |
| NBR41              | 4,129,017 | 4,143,359 | 14.3 | NBS73        | 15.35        | ATTTCC <b>tGa</b> GAAATNBS28,36, 6:                  | 4,136,398 | 4,136,411 |           |
| ND                 |           |           |      | NBS74        | 15.54        | ATT <b>g</b> CC <b>aa</b> GGAAAT                     | 4,150,991 | 4,151,004 |           |
| Spo0J <sup>f</sup> |           |           |      |              |              | TGTTTCACGTGAAACA (consensus)                         |           |           |           |
| OJ1                | 41,890    | 57,001    | 15.1 | OJBS1        | 23.21        | TGTT <b>a</b> CACGTGAA<br>ACA                        | 47,640    | 47,655    |           |
| OJ2                | 176,308   | 193,136   | 16.8 | OJBS2        | 23.10        | TGTT <b>a</b> CACGTG <b>tA</b><br>ACA                | 185,161   | 185,176   |           |
| OJ3                | 467,785   | 482,280   | 14.5 | OJBS3        | 21.88        | <b>c</b> GT <b>Tc</b> CA <b>t</b> GTGAA<br>ACA       | 471,151   | 471,166   |           |
| OJ9                | 1,054,553 | 1,062,814 | 8.3  | OJBS9        | 21.13        | <b>a</b> GT <b>cc</b> Ca <b>T</b> GAA<br>AC <b>g</b> | 1,056,855 | 1,056,870 |           |
| ND                 |           |           |      | OJBS10       | 20.20        | TGTT <b>c</b> CA <b>taa</b> GAA<br>ACA               | 2,414,565 | 2,414,580 |           |
| OJ4                | 3,903,912 | 3,916,703 | 12.8 | OJBS4        | 23.21        | TGTT <b>a</b> CACGTGAA<br>ACA                        | OJ5       | 3,910,454 | 3,910,469 |
| OJ5                |           |           |      | OJBS5        | 23.21        | TGTT <b>a</b> CACGTGAA<br>ACA                        | OJ4       | 4,146,458 | 4,146,473 |
| OJ6                | 4,128,420 | 4,174,412 | 46.0 | OJBS6        | 22.71        | <b>c</b> GT <b>TTc</b> ACGTGAA<br>ACA                | 4,151,806 | 4,151,821 |           |
| OJ7                |           |           |      | OJBS7        | 22.57        | TGTT <b>TCa</b> <b>t</b> GTGAA<br>ACA                | 4,165,780 | 4,165,795 |           |
| OJ8                | 4,187,425 | 3,529     | 30.7 | OJBS8        | 23.24        | TGTT <b>c</b> CACGTGAA<br>ACA                        | 4,204,760 | 4,204,775 |           |

<sup>a</sup> Peaks of Noc- and Spo0J-binding regions were automatically detected by the methods as described in materials and methods. Note that some peaks NBR7 & 8, NBR28 & 29, NBR30 & 31, NBR35 & 36 and OJ05, 06 & 07 were merged.

<sup>b</sup> Bases different from the predicted consensus binding sequences are indicated in red; NBSs with PWM score values < 15.15 are

<sup>c</sup> ID of NBS at other genome position is shown if exist.

<sup>d</sup> Not detected.

<sup>e</sup> The GeneChip used in this study does not have probes in phage-related regions.

<sup>f</sup> Spo0J-binding peaks were detected by using data set previously published (Ishikawa et al., 2007).

## Supplemental Data

Figure S1 Dynamic localization of Noc-YFP captured using timelapse microscopy.

Strain 4702 with a *noc-yfp* fusion (and without the native *noc*) growing exponentially in CH medium containing 0.3 % xylose was imaged at 28°C using a Spinning Disc Confocal System. The black lines mark the left or the right edge of the YFP signals at the beginning of the timelapse experiment (t0). Scale bar, 2 μm.

Figure S2 DNA binding profiles of Spo0J and Noc proteins on the *B. subtilis* genome revealed using ChAP-chip analysis. Binding signals of Spo0J (SI002, top), and Noc in a wild-type strain (4704, middle) and in a mutant strain with NBS-insertion at *yogA* region and deletion at *ywsA* region (4723, bottom) are shown. Top and bottom lines indicate signal intensities of 20 and 0 respectively. Middle lines exhibit threshold values to detect binding regions. Noc and Spo0J binding regions detected by our algorithm are shown as pink and green boxes with IDs, respectively. Positions of Noc binding sequence (NBS) with high score of PWM value and Spo0J binding sequence (*parS*) are also indicated by vertical lines under gene map. The insertion of 8 copies of NBS between *yogA* and *gltB*, and the deletion of NBS by replacing with a *tet* cassette between *ywsB* and *ywsA* in strain 4723 are also indicated.

Figure S3 Enrichment of DNA at selected NBRs as detected by ChAP using specific primer pairs. (A) ChAP analysis of the various strains harbouring an NBS deletion and /or insertion. Modified chromosomal regions are indicated in the upper part of the table. DNA fragments co-purified with Noc (ChAP) and total DNA extracted before ChAP-purification (Sup) were diluted 16-fold and 64-fold, respectively, and used as templates for quantitative PCR after a further 4-fold serial dilutions (lane 1, 2 and 3). Lower part of the panel shows the PCR products obtained with either the 'total' DNA (Sup), or ChAP-

purified DNA (ChAP), using primer pairs shown to the left. Two different reverse primers were used with kan-F and are indicated above the DNA bands. Primer pairs *ydbO-F* and *ydbO-R* are used to amplify the NBS located in the *ydbO* gene, which has been used for gel-shift assay (Figure 5). (B) Schematic map of the chromosomal regions that have been modified, showing the locations of the NBSs (in red), and the locations of the primers (in blue). a to h represent the PCR products obtained (in A) from the corresponding regions (in B).

Figure S4 Mutant protein Noc(K164A) is not able to bind the NBS in vitro. In the gel-shift assay the Noc(K164A)-12xHis was incubated with 25 nM of a Cy5-labelled probe containing the NBS from the *ydbO* gene. Unlabelled competitor DNA (wild type NBS or a mutant NBS) was present at concentrations of 0, 125 nM, 250nM, 500nM, 1 $\mu$ M or 2  $\mu$ M.

Figure S5 Localization of Noc-YFP in cells harbouring a multicopy plasmid carrying an NBS array (strain 4707; panels A-C) or without an NBS (strain 4706; panels D-F), grown in the presence of 0.3% xylose. A and D show the localization of Noc-YFP; B and E are images of nucleoids stained with DAPI; and C and F are overlaid images with Noc-YFP shown in green and DNA (DAPI) in red. Scale bar, 2  $\mu$ m.
