# Supplementary material
Source: PubMed Central journal article supplement (PMC2711181)
Supplement: emboj2009144s2.pdf [file emboj2009144s2.pdf]

Manuscript EMBO-2009-70649

## **Noc protein binds to specific DNA sequences to coordinate cell division with chromosome segregation**

Ling Juan Wu, Shu Ishikawa, Yoshikazu Kawai, Taku Oshima, Naotake Ogasawara

*Corresponding author: Jeff Errington, Newcastle University*

---

**Review timeline:**

Submission date:  
Accepted:

16 February 2009  
04 May 2009

---

No Review Process File is available with this article, as the authors have chosen not to make the review process public in this case.
